# Supplementary material for: Network Signatures of Survival in Glioblastoma Multiforme
Source: PLoS Comput Biol. 2013 Sep 19;9(9):e1003237. doi: 10.1371/journal.pcbi.1003237 (PMC3777929; doi:10.1371/journal.pcbi.1003237)
Supplement: Table S1 — List of 50 genes in the subnetwork signature of survival for primary GBM. (PDF) [file pcbi.1003237.s005.pdf]

Table S1. List of 50 genes in the subnetwork signature of survival for primary GBM.

| <b>Gene Name</b> | <b>Entrez GeneID</b> |
|------------------|----------------------|
| <b>ACTG1</b>     | 71                   |
| <b>ARHGEF2</b>   | 9181                 |
| <b>BCL6</b>      | 604                  |
| <b>CANX</b>      | 821                  |
| <b>CASP3</b>     | 836                  |
| <b>CHUK</b>      | 1147                 |
| <b>CLCA2</b>     | 9635                 |
| <b>CRK</b>       | 1398                 |
| <b>CTGF</b>      | 1490                 |
| <b>CTNNB1</b>    | 1499                 |
| <b>DDX5</b>      | 1655                 |
| <b>DNM1</b>      | 1759                 |
| <b>DPPA4</b>     | 55211                |
| <b>EP300</b>     | 2033                 |
| <b>EPOR</b>      | 2057                 |
| <b>FMOD</b>      | 2331                 |
| <b>GSN</b>       | 2934                 |
| <b>GTF2B</b>     | 2959                 |
| <b>HSPA9</b>     | 3313                 |
| <b>IGF1R</b>     | 3480                 |
| <b>IKBKAP</b>    | 8518                 |
| <b>IKBKB</b>     | 3551                 |
| <b>ITGA6</b>     | 3655                 |
| <b>LRP1</b>      | 4035                 |
| <b>MAP2K1</b>    | 5604                 |
| <b>MAPK1</b>     | 5594                 |
| <b>MYBBP1A</b>   | 10514                |
| <b>NCKAP1</b>    | 10787                |
| <b>NCOA3</b>     | 8202                 |
| <b>PAK1</b>      | 5058                 |
| <b>PES1</b>      | 23481                |
| <b>PHC3</b>      | 80012                |
| <b>PLCG1</b>     | 5335                 |
| <b>POU3F2</b>    | 5454                 |
| <b>PRKCI</b>     | 5584                 |
| <b>PSMD3</b>     | 5709                 |
| <b>PSMD6</b>     | 9861                 |
| <b>PSME3</b>     | 10197                |
| <b>PXN</b>       | 5829                 |
| <b>RPL4</b>      | 6124                 |
| <b>STAT3</b>     | 6774                 |
| <b>SYN1</b>      | 6853                 |
| <b>TANK</b>      | 10010                |
| <b>TBP</b>       | 6908                 |
| <b>TGFB3</b>     | 7043                 |
| <b>TGFBR1</b>    | 7046                 |
| <b>TOP1</b>      | 7150                 |
| <b>TRAF6</b>     | 7189                 |
| <b>USP7</b>      | 7874                 |
| <b>YWHAQ</b>     | 10971                |
