# Supplementary material for: Network Signatures of Survival in Glioblastoma Multiforme
Source: PLoS Comput Biol. 2013 Sep 19;9(9):e1003237. doi: 10.1371/journal.pcbi.1003237 (PMC3777929; doi:10.1371/journal.pcbi.1003237)
Supplement: Table S4 — List of significant GO terms overlapping between the Verhaak subtypes and CRANE 50-gene subnetwork signature. (XLS) [file pcbi.1003237.s008.xls]

## Sheet: Overlap between CRANE & Verhaak
GO Term	Description	CRANE p-value	Verhaak p-value	Subtype	CRANE Genes	Verhaak Genes
GO:0006355	regulation of transcription, DNA-dependent	0.00604975	0.000692	Classical	IKBKAP, MAP2K1, TGFB3, TBP, GTF2B, STAT3, CTNNB1, EP300, NCOA3, YWHAQ, BCL6, POU3F2, CRK, MYBBP1A	ZNF8, NR2F6, CREB5, ZNF228, ZNF671, MEOX2, ZNF211, ZNF264, JUND, ZNF227, SHOX2, KEAP1, ARNTL, ZNF45, ZNF446, ERCC2, EYA2, ZNF419, RFX2, NPAS3, MEIS1, ZNF20, HMG20B, TBX2, TLE2, RFXANK, CC2D1A, SOX9, NR2E1, ZNF606, GLI2, TGIF2, TEAD3, IRF3, ZNF304, ZFHX4, ZNF134,
GO:0007010	cytoskeleton organization	0.000709522	0.000595	Proneural	ACTG1, ARHGEF2, GSN, PRKCI, BCL6, PAK1, CRK, CTNNB1	STMN1, WASF1, CLASP2, CDKN1B, KIF21B, EPB41, MAP2, MAPT, SPTBN2, TMSL8, MTSS1, FHOD3, DBN1, PFN2, MAST1,
GO:0042127	regulation of cell proliferation	0.0052769	0.0031772	Mesenchymal	IGF1R, MAPK1, ARHGEF2, CASP3, TGFBR1, TGFB3, BCL6, POU3F2, CTNNB1	LAMB1, STAT6, S100A11, TCIRG1, RHOG, PTPN6, RAC2, TIMP1, POLD4, NRP1, EMP3, TGFBR2, IGFBP6, PTPRC, TNFRSF11A, SHC1, ANXA1, GRN,
GO:0043228	non-membrane-bounded organelle	0.000671762	0.00103658	Proneural	IKBKAP, ARHGEF2, MAP2K1, DDX5, STAT3, PXN, CTNNB1, ACTG1, MAPK1, TOP1, CASP3, EP300, SYN1, GSN, BCL6, RPL4, PES1, MYBBP1A, DNM1, HSPA9	STMN1, CASK, TAF5, NR0B1, TMSL8, RAD21, CBX1, NOL4, DNM3, FHOD3, CHD7, PFN2, MAST1, TOPBP1, TOP2B, WASF1, SATB1, CLASP2, KIF21B, DCX, MYO10, EPB41, MAP2, ACTR1A, HDAC2, MAPT, SPTBN2, HMGB3, MTSS1, LOC81691, DBN1,
GO:0043232	intracellular non-membrane-bounded organelle	0.000671762	0.00103658	Proneural	IKBKAP, ARHGEF2, MAP2K1, DDX5, STAT3, PXN, CTNNB1, ACTG1, MAPK1, TOP1, CASP3, EP300, SYN1, GSN, BCL6, RPL4, PES1, MYBBP1A, DNM1, HSPA9	STMN1, CASK, TAF5, NR0B1, TMSL8, RAD21, CBX1, NOL4, DNM3, FHOD3, CHD7, PFN2, MAST1, TOPBP1, TOP2B, WASF1, SATB1, CLASP2, KIF21B, DCX, MYO10, EPB41, MAP2, ACTR1A, HDAC2, MAPT, SPTBN2, HMGB3, MTSS1, LOC81691, DBN1,
GO:0045449	regulation of transcription	0.00481533	0.00117437	Classical	IKBKAP, MAP2K1, TGFBR1, TGFB3, TBP, DDX5, GTF2B, STAT3, CTNNB1, MAPK1, EP300, NCOA3, YWHAQ, POU3F2, BCL6, IKBKB, CRK, MYBBP1A	ZNF8, POFUT1, NR2F6, CREB5, ZNF228, ZNF671, MEOX2, ZNF211, ZNF264, JUND, ZNF227, SHOX2, KEAP1, ARNTL, ZNF45, ZNF446, ERCC2, EYA2, ZNF419, RFX2, NPAS3, MEIS1, ZNF20, HMG20B, TBX2, TLE2, RFXANK, CC2D1A, SOX9, NR2E1, ZNF606, GLI2, TGIF2, TEAD3, IRF3, ZNF304, ZFHX4, ZNF134,
